# Supplementary material
Source: PubMed Central journal article supplement (PMC7354919)
Supplement: mmc1.pdf [file mmc1.pdf]

# THE LANCET

## Supplementary appendix

This appendix formed part of the original submission. We post it as supplied by the authors.

Supplement to: Phumaphi J, Mason E, Alipui NK, et al. A crisis of accountability for women's, children's, and adolescents' health. *Lancet* 2020; published online July 13. [http://dx.doi.org/10.1016/S0140-6736\(20\)31520-8](http://dx.doi.org/10.1016/S0140-6736(20)31520-8).

### Study group: IAP 2020 Report team

| First initials and Surname |
|----------------------------|
| K. Aschenaki Bizuneh       |
| A. Ayala                   |
| A. Beattie                 |
| L. Frost                   |
| J. Gupta                   |
| R. Hinton                  |
| C. Homer                   |
| C. Hommes                  |
| A. W. Ileri                |
| I. Kalnina                 |
| O. Luusah                  |
| N. J. Mawad                |
| B. Méndez                  |
| I. Nadareishvili           |
| R. Power                   |
| B. Pratt                   |
| M. Renshaw                 |
| G. A. Stevens              |
| T. Talakvadze              |
| V. Victoria                |

### Study group, IAP 2020 report team

The Study group, IAP 2020 report team includes: Beth Anne Pratt and Laura Frost of Global Health Insights who conducted literature reviews for the IAP report, including on the emerging evidence on COVID-19. Gretchen A. Stevens and Jaya Gupta undertook the data review and statistical analysis, and contributed to the writing of the report. Allison Beattie analysed the IAP report findings and the IAP external evaluation to inform the IAP's forward recommendations. Ilze Kalnina and Narissia J. Mawad from the IAP Secretariat coordinated technical inputs, reviewed documents and drafts, and managed references and other resources. Rachael Hinton of RHEdit provided technical assistance for the country case studies and report development. The IAP 2020 report country case study teams are: 1) Papua New Guinea, under the leadership of Carol Kidu with Burnet Institute: Robert Power and Caroline Homer. 2) Georgia, under the leadership of Giorgi Pkhakadze with David Tvildiani Medical University: Ilia Nadareishvili and Tamar Talakvadze. 3) Kenya, under the leadership of Joy Phumaphi with the Federation of Women Lawyers (FIDA-Kenya): Anne W. Ileri and Olivia Luusah. 4) Ethiopia: based on the UNICEF Social Accountability for Healthcare

Quality Improvement Study, 2019 well as case studies and best practices and lessons learned documents on Ethiopia Ministry of Health Community Scorecards by the Ethiopia Federal Ministry of Health and ALMA: Joy Phumaphi, Melanie Renshaw, and Ketema Aschenaki Bizuneh, ALMA. 5) Guatemala, with the Observatory on Sexual and Reproductive Health: Bernarda Méndez consultant, PAHO/WHO: Carolina Hommes, Amalia Ayala, and Vanessa Victoria.

The IAP gratefully acknowledges all those who contributed to the IAP 2020 report by providing data sources, reviewing drafts, participating in the country case studies, editing, design, and many other contributions that are detailed in the IAP report.
